# Supplementary material for: Angular-dependent magnetoresistance modulated by interfacial magnetic state in Pt/LSMO heterostructures
Source: Royal Society of Chemistry journal article supplement (doi:10.1039/d4cp01175a), 2024-01-01
Supplement: d4cp01175a1.pdf [file d4cp01175a1.pdf]

## Supporting Information

### **Angular-dependent Magnetoresistance Modulated by Interfacial Magnetic State in Pt/LSMO Heterostructures**

Ruikang Li,<sup>1</sup> Chao Jin,<sup>1\*</sup> Xingmo Zhang,<sup>2</sup> Jiangtao Qu,<sup>3</sup> Dongxing Zheng,<sup>4</sup> Wenxue He,<sup>1,5</sup> Fan Yang,<sup>1,5</sup> Rongkun Zheng,<sup>2</sup> and Haili Bai<sup>1</sup>

<sup>1</sup>*Tianjin Key Laboratory of Low Dimensional Materials Physics and Processing  
Technology, School of Science, Tianjin University, Tianjin 300350, China*

<sup>2</sup>*School of Physics, The University of Sydney, Sydney, NSW 2006, Australia*

<sup>3</sup>*Australian Centre for Microscopy & Microanalysis, The University of Sydney,  
Sydney, NSW 2006, Australia*

<sup>4</sup>*Physical Science and Engineering Division, King Abdullah University of Science and  
Technology, Thuwal 23955-6900, Saudi Arabia*

<sup>5</sup>*Center for Joint Quantum Studies, School of Science, Tianjin University, Tianjin  
300350, China*

---

\*Author to whom all correspondence should be addressed.

E-mail: chaojin@tju.edu.cn

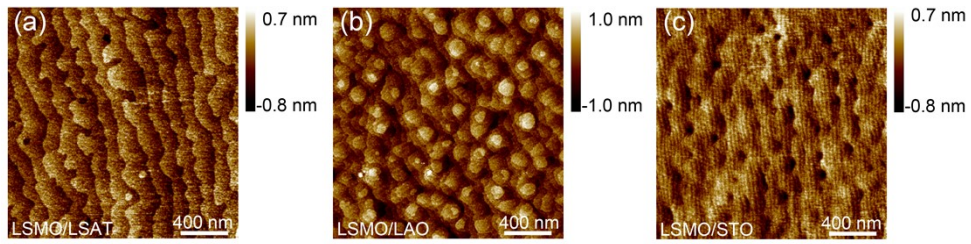

**Fig. S1** Atomic force microscopy images of LSMO films on (a) LSAT, (b) LAO, and (c) STO substrates.

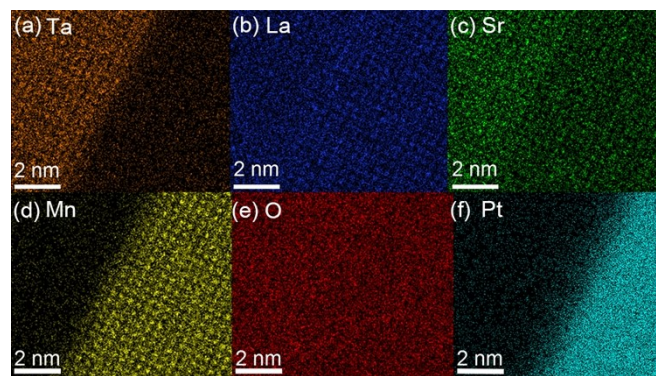

**Fig. S2** Energy dispersive spectroscopy mapping of Ta, La, Sr, Mn, O, and Pt elements of LSMO/LSAT and Pt/LSMO interfaces.

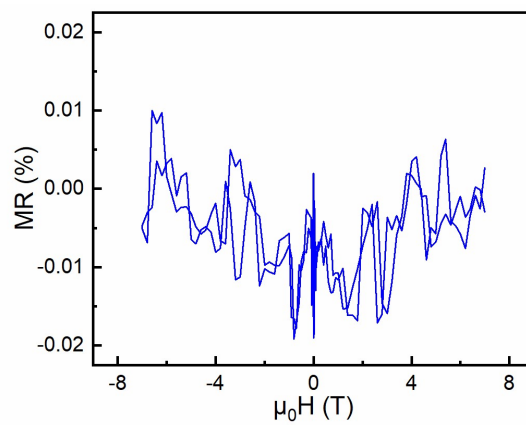

**Fig. S3** FDMR curve of Pt single layer (3 nm) on STO ( $H||z$ ) at 100 K.

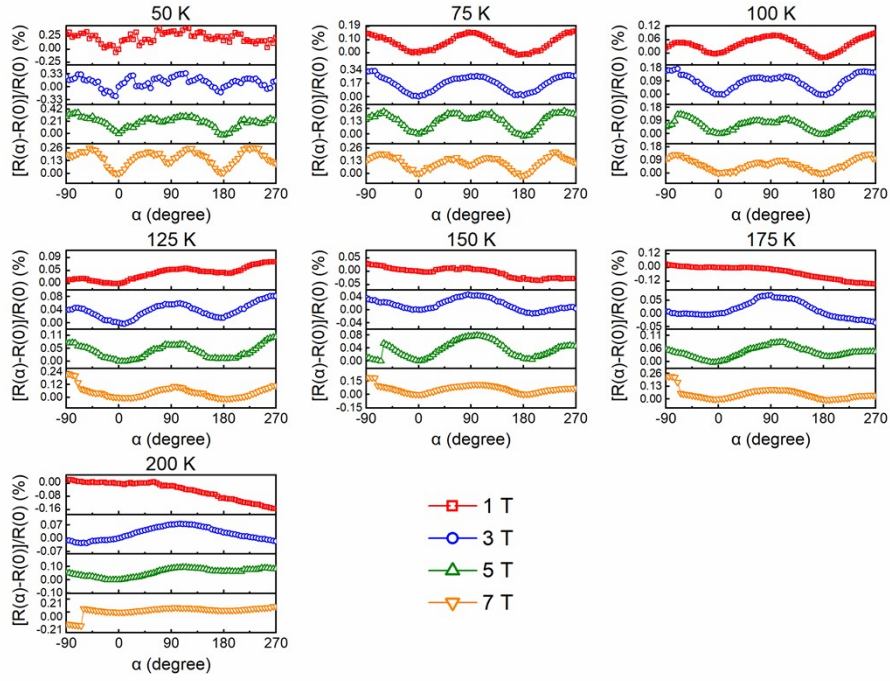

**Fig. S4** ADMR curves of Pt(3 nm)/LSMO(20 nm)/LAO in the  $xy$  plane.

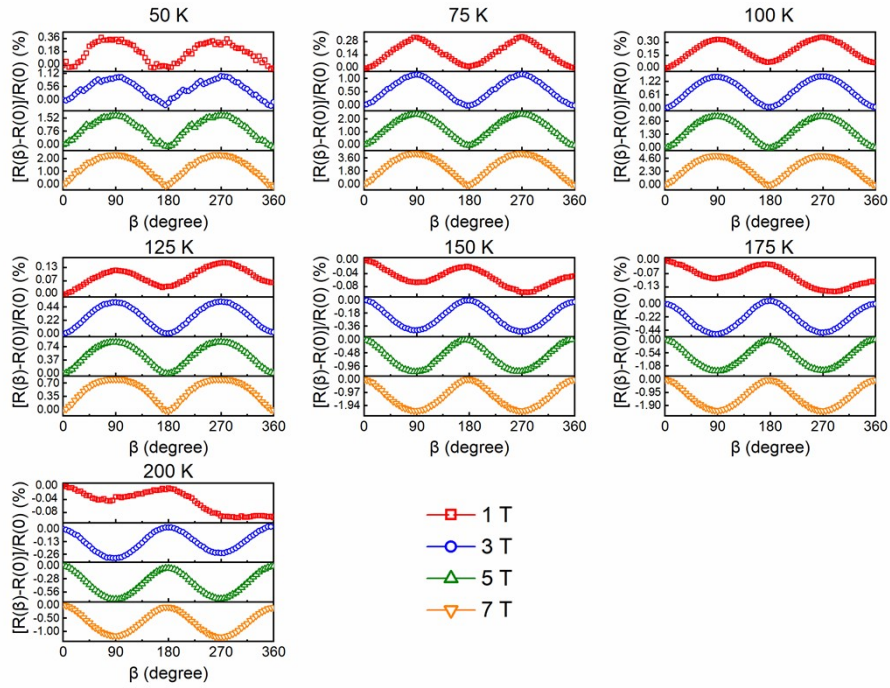

**Fig. S5** ADMR curves of Pt(3 nm)/LSMO(20 nm)/LAO in the  $yz$  plane.

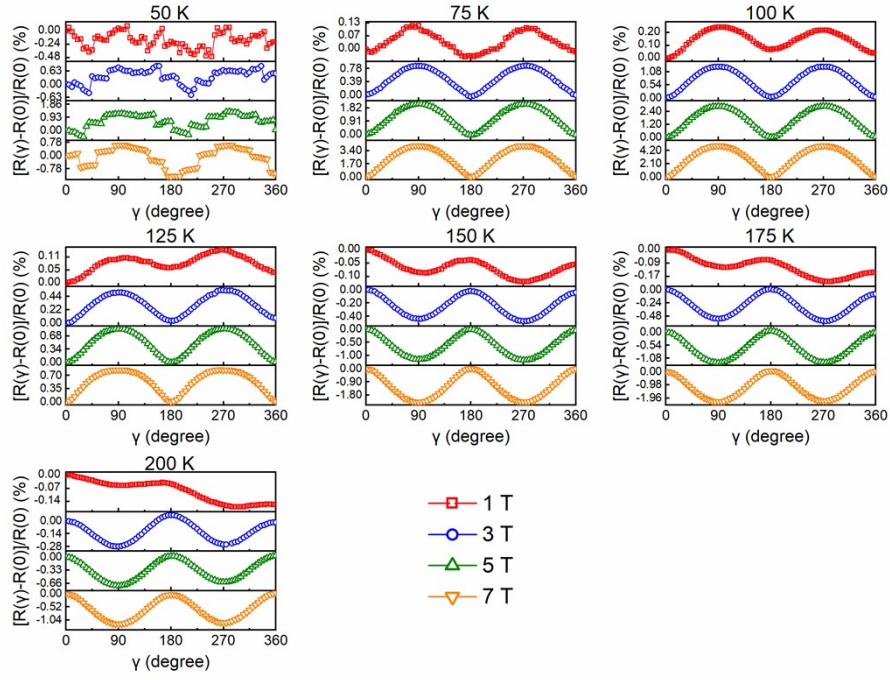

**Fig. S6** ADMR curves of Pt(3 nm)/LSMO(20 nm)/LAO in the  $xz$  plane.

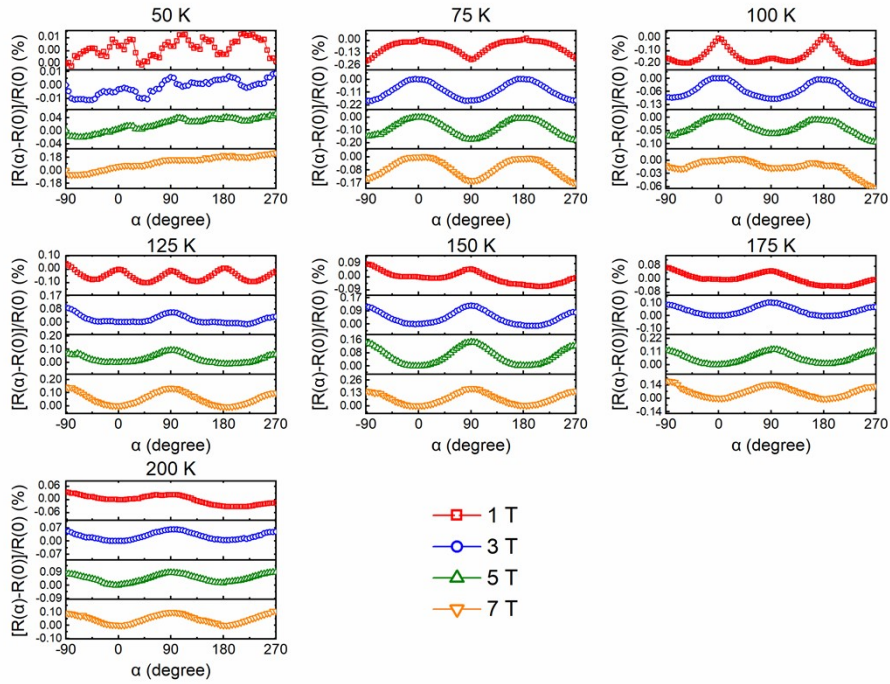

**Fig. S7** ADMR curves of Pt(3 nm)/LSMO(20 nm)/STO in the  $xy$  plane.



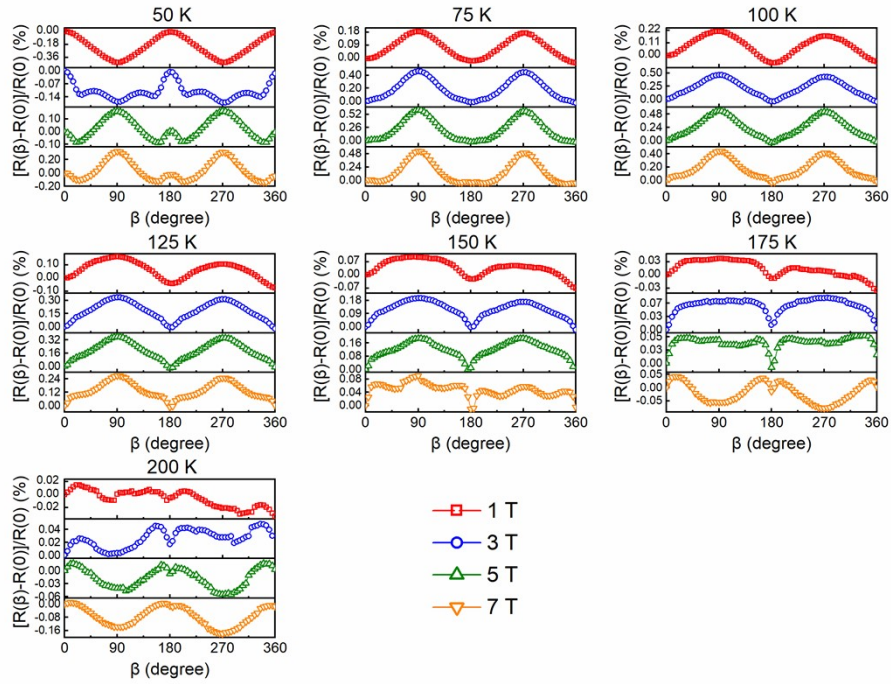

**Fig. S8** ADMR curves of Pt(3 nm)/LSMO(20 nm)/STO in the  $yz$  plane.

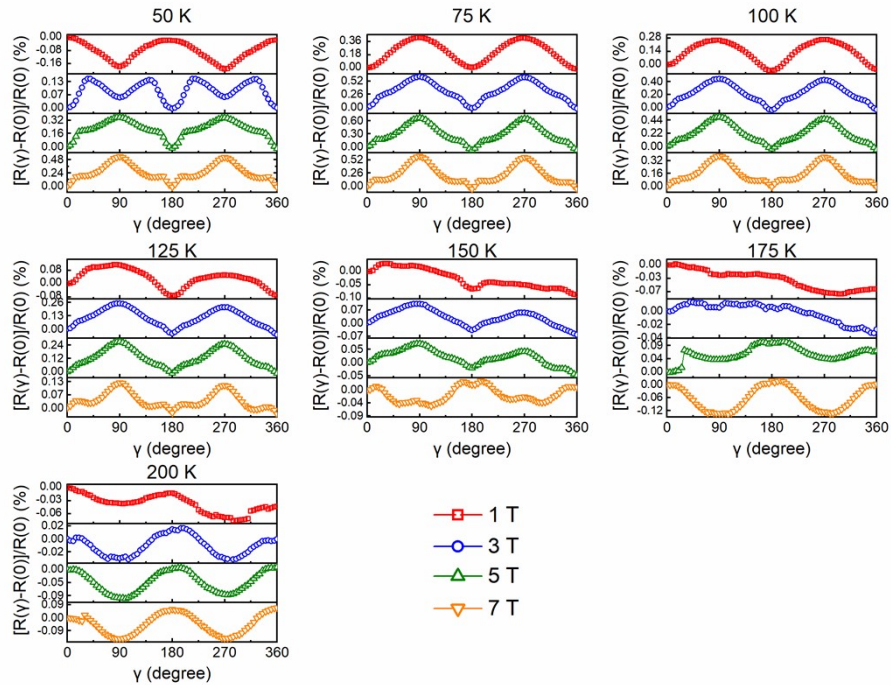

**Fig. S9** ADMR curves of Pt(3 nm)/LSMO(20 nm)/STO in the  $xz$  plane.

**Tab. S1** Transition temperatures of  $\rho_{xx}$ - $T$ , FDMR, and ADMR curves.  $T_{\text{MIT}}$  refers to the metal-insulating transition temperature of the  $\rho_{xx}$ - $T$  curve.  $T_{\text{FDMRT}}$  and  $T_{\text{ADMR}(\beta, \gamma)\text{T}}$  are the positive and negative transition temperatures for FDMR and ADMR, respectively.

|     | $T_{\text{MIT}}$ (K) | $T_{\text{FDMRT}}$ (K) | $T_{\text{ADMR}(\beta, \gamma)\text{T}}$ (K) |
|-----|----------------------|------------------------|----------------------------------------------|
| LAO | 140                  | 125-150                | 125-150                                      |
| STO | 56                   | 50-75                  | (50-75)/150                                  |

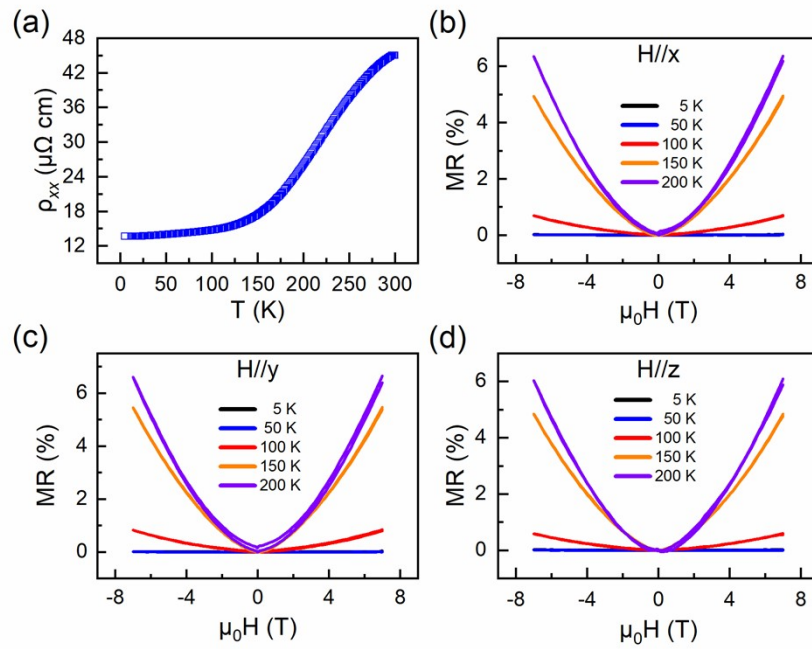

**Fig. S10** (a)  $\rho_{xx}$ - $T$  curve and (b)-(d) FDMR of Pt(3 nm)/LSMO(6 nm)/LAO [(b)  $H//x$ , (c)  $H//y$ , (d)  $H//z$ ].

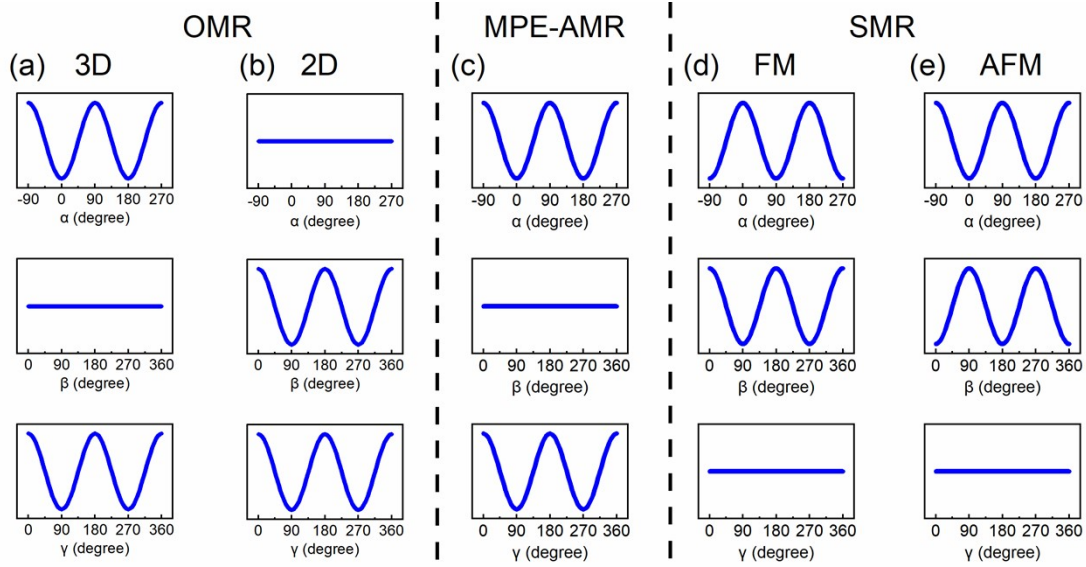

**Fig. S11** Theoretical results of OMR, MPE-induced AMR, and SMR.

Theoretically, OMR exhibits a relatively low resistance for  $H//I$  and a high resistance for  $H \perp I$  in the three-dimensional (3D) system, i.e., there is an ADMR signal when  $H$  rotates in the  $xy$  and  $xz$  planes, but no signal in the  $yz$  plane, as shown in Fig. S11(a).<sup>1</sup> In the two-dimensional (2D) system, the movement of electrons is limited in the  $xy$  plane, and the Lorentz force causes the OMR in the  $yz$  and  $xz$  planes, showing the high resistance when  $H//z$  [Fig. S11(b)].<sup>2</sup>

Due to the MPE, the Pt atoms near the magnet can produce magnetic moments and long-range ferromagnetic (FM) ordering,<sup>3</sup> further inducing the MPE-induced AMR, which can be observed in the  $xy$  and  $xz$  planes but does not exist in the  $yz$  plane, as shown in Fig. S11(c).<sup>1</sup>

In the heavy metal/FM insulator heterostructures, due to the SMR effect, a high (low) resistance state can be formed when the magnetization is perpendicular (parallel)

to the spin accumulation at the interface.<sup>4</sup> Due to the spin accumulation along the  $y$ -axis, a change in the resistance can be observed when the magnetic field (magnetization) rotates in the  $xy$  and  $yz$  planes, as shown in Fig. S11(d). In the  $xz$  plane, the magnetization is always perpendicular to the spin accumulation, and the change in the resistance disappears. Therefore, the SMR can be observed in the  $xy$  and  $yz$  planes, but it disappears in the  $xz$  plane. In the heavy metal/AFM insulator heterostructures, the magnetization is no longer parallel to the magnetic field and forms a spin tilting towards the direction of the magnetic field.<sup>5</sup> Therefore, the SMR of the heavy metal/AFM insulator heterostructures has the opposite angular dependence in the  $xy$  and  $yz$  planes to the heavy metal/FM insulator heterostructures, as show in Fig. S11(e).<sup>6</sup>



## Reference

- (1) Amamou, W.; Pinchuk, I. V.; Trout, A. H.; Williams, R. E. A.; Antolin, N.; Goad, A.; O'Hara, D. J.; Ahmed, A. S.; Windl, W.; McComb, D. W.; Kawakami, R. K. Magnetic proximity effect in Pt/CoFe<sub>2</sub>O<sub>4</sub> bilayers. *Phys. Rev. Mater.* **2018**, *2*, 011401.
- (2) Baldrati, L.; Ross, A.; Niizeki, T.; Schneider, C.; Ramos, R.; Cramer, J.; Gomonay, O.; Filianina, M.; Savchenko, T.; Heinze, D.; Kleibert, A.; Saitoh, E.; Sinova, J.; Kläui, M. Full angular dependence of the spin Hall and ordinary magnetoresistance in epitaxial antiferromagnetic NiO(001)/Pt thin films. *Phys. Rev. B* **2018**, *98*, 024422.
- (3) Nodo, S.; Ono, S.; Yanase, T.; Shimada, T.; Nagahama, T.; Controlling the magnetic proximity effect and anomalous Hall effect in CoFe<sub>2</sub>O<sub>4</sub>/Pt by ionic gating. *Appl. Phys. Express.* **2020**, *13*, 063004.
- (4) Nakayama, H.; Althammer, M.; Chen, Y.-T.; Uchida, K.; Kajiwara, Y.; Kikuchi, D.; Ohtani, T.; Geprägs, S.; Opel, M.; Takahashi, S.; Gross, R.; Bauer, G. E. W.; Goennenwein, S. T. B.; and Saitoh, E. Spin Hall Magnetoresistance Induced by a Nonequilibrium Proximity Effect. *Phys. Rev. Lett.* **2013**, *110*, 206601.
- (5) Van Rijn, J. J. L.; Wang, D.; Sanyal, B.; and Banerjee, T. Strain-driven antiferromagnetic exchange interaction in SrMnO<sub>3</sub> probed by phase-shifted spin Hall magnetoresistance. *Phys. Rev. B* **2022**, *106*, 214415.
- (6) Hoogeboom, G. R.; Aqeel, A.; Kuschel, T.; Palstra, T. T. M.; and van Wees, B. J.

Negative spin Hall magnetoresistance of Pt on the bulk easy-plane antiferromagnet

NiO. *Appl. Phys. Lett.* **2017**, *111*, 052409.
